# Supplementary material for: A novel substitution reaction of perylene bisimides with Ph2PLi at the α-position
Source: Royal Society of Chemistry journal article supplement (doi:10.1039/b9nj00364a), 2009-10-23
Supplement: b9nj00364a.pdf [file b9nj00364a.pdf]

## SUPPORTING INFORMATION

### A Novel Substitution Reaction of Perylene Bisimides with Ph<sub>2</sub>PLi at $\alpha$ -Position

Xue Wu, Chuanwei Yin, Zhiqiang Shi\*, Maoyou Xu,  
Jin Zhang, Juanjuan Sun

Department of Chemistry, Shandong Normal  
University, Jinan, 250014, P. R. China.

[zshi@sdu.edu.cn](mailto:zshi@sdu.edu.cn)

#### CONTENTS:

|                                                                                       |    |
|---------------------------------------------------------------------------------------|----|
| <b>Figure S1</b> <sup>1</sup> H-NMR and <sup>13</sup> C-NMR spectra of <b>1</b> ..... | S2 |
| <b>Figure S2</b> MS and <sup>31</sup> P-NMR spectra of <b>1</b> .....                 | S3 |
| <b>Figure S3</b> <sup>1</sup> H-NMR and <sup>13</sup> C-NMR spectra of <b>2</b> ..... | S4 |
| <b>Figure S4</b> MS and <sup>31</sup> P-NMR spectra of <b>2</b> .....                 | S5 |
| <b>Figure S5</b> <sup>1</sup> H-NMR and <sup>13</sup> C-NMR spectra of <b>3</b> ..... | S6 |
| <b>Figure S6</b> MS and <sup>31</sup> P-NMR spectra of <b>3</b> .....                 | S7 |

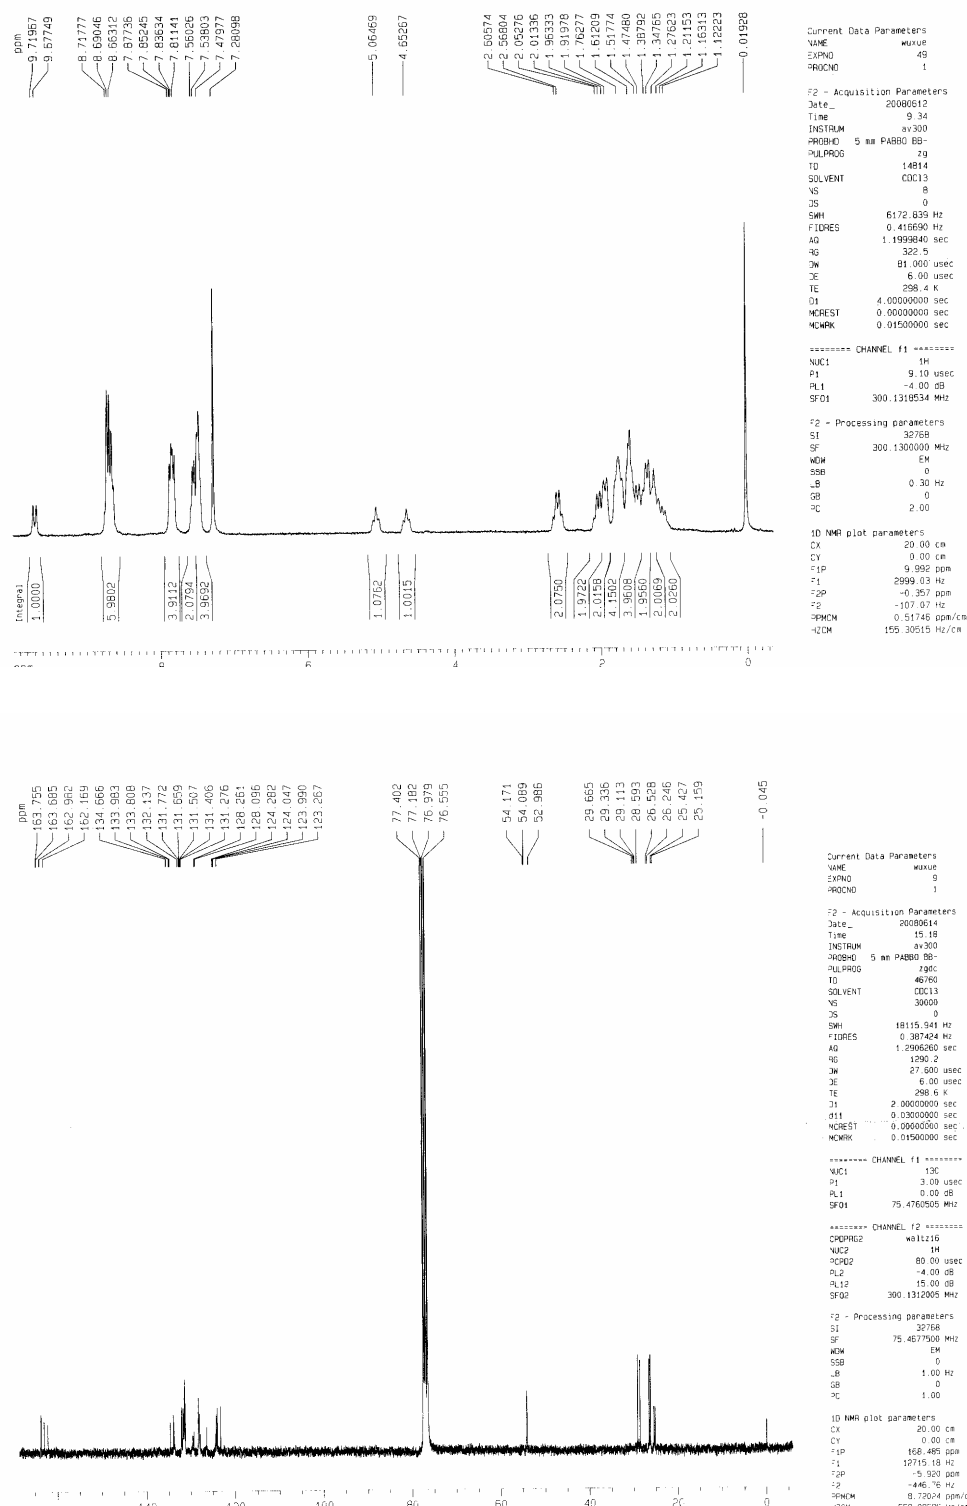

Figure S1 <sup>1</sup>H-NMR and <sup>13</sup>C-NMR spectra of **1**.



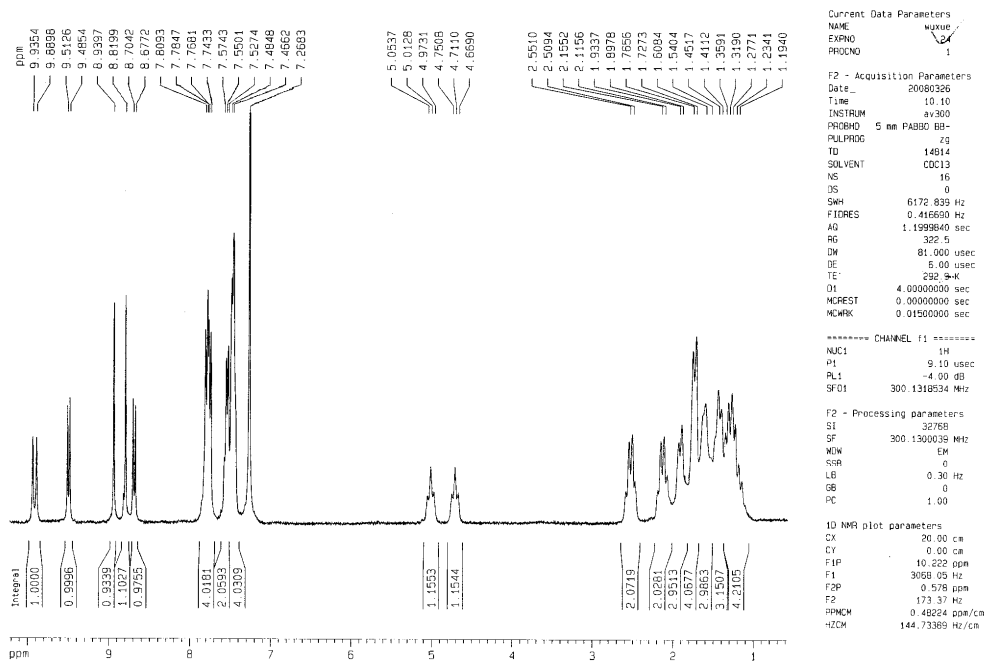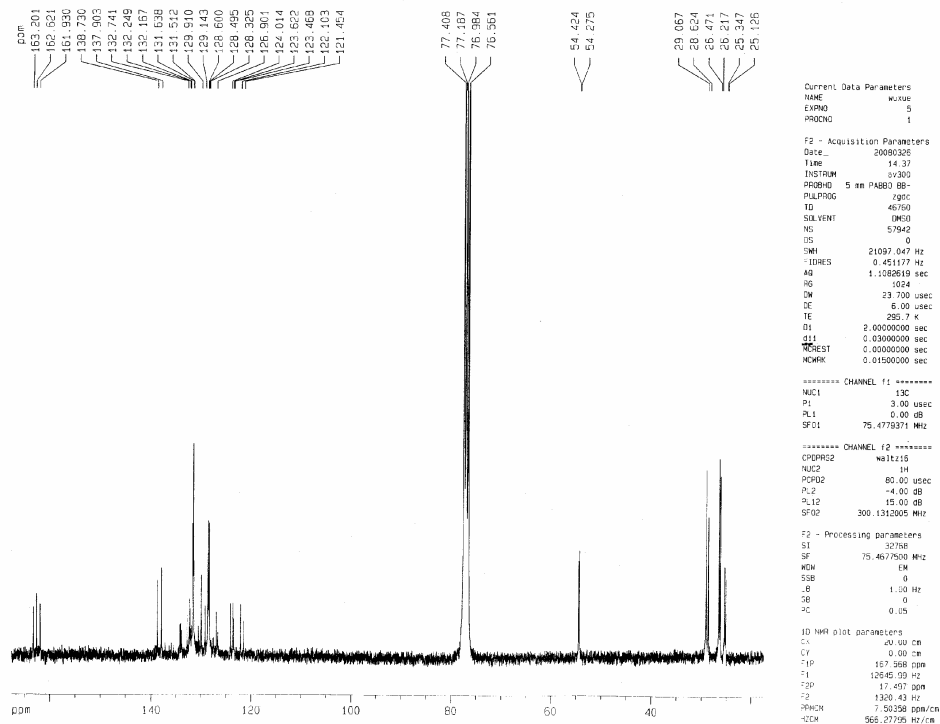

Figure S3  $^1\text{H}$ -NMR and  $^{13}\text{C}$ -NMR spectra of **2**.

D:\Data\_IC\2008\08-05\20080507\20080507110\_B21

printed: 5/7/2008 2:37:17 PM

### MALDI-TOF, CCA, W02, 2008, 05, 07

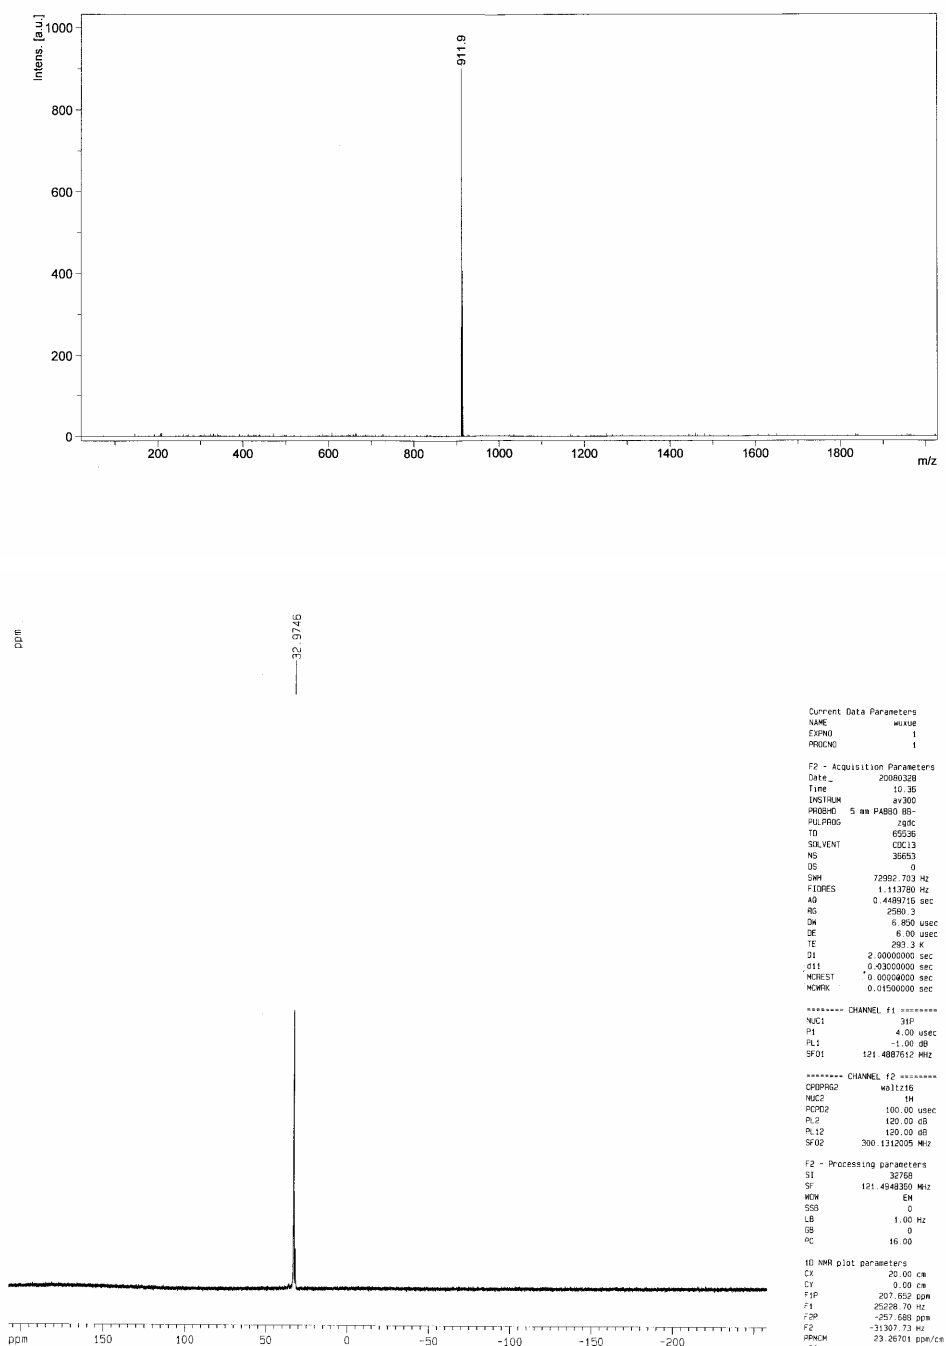

Figure S4 MS and <sup>31</sup>P-NMR spectra of 2.

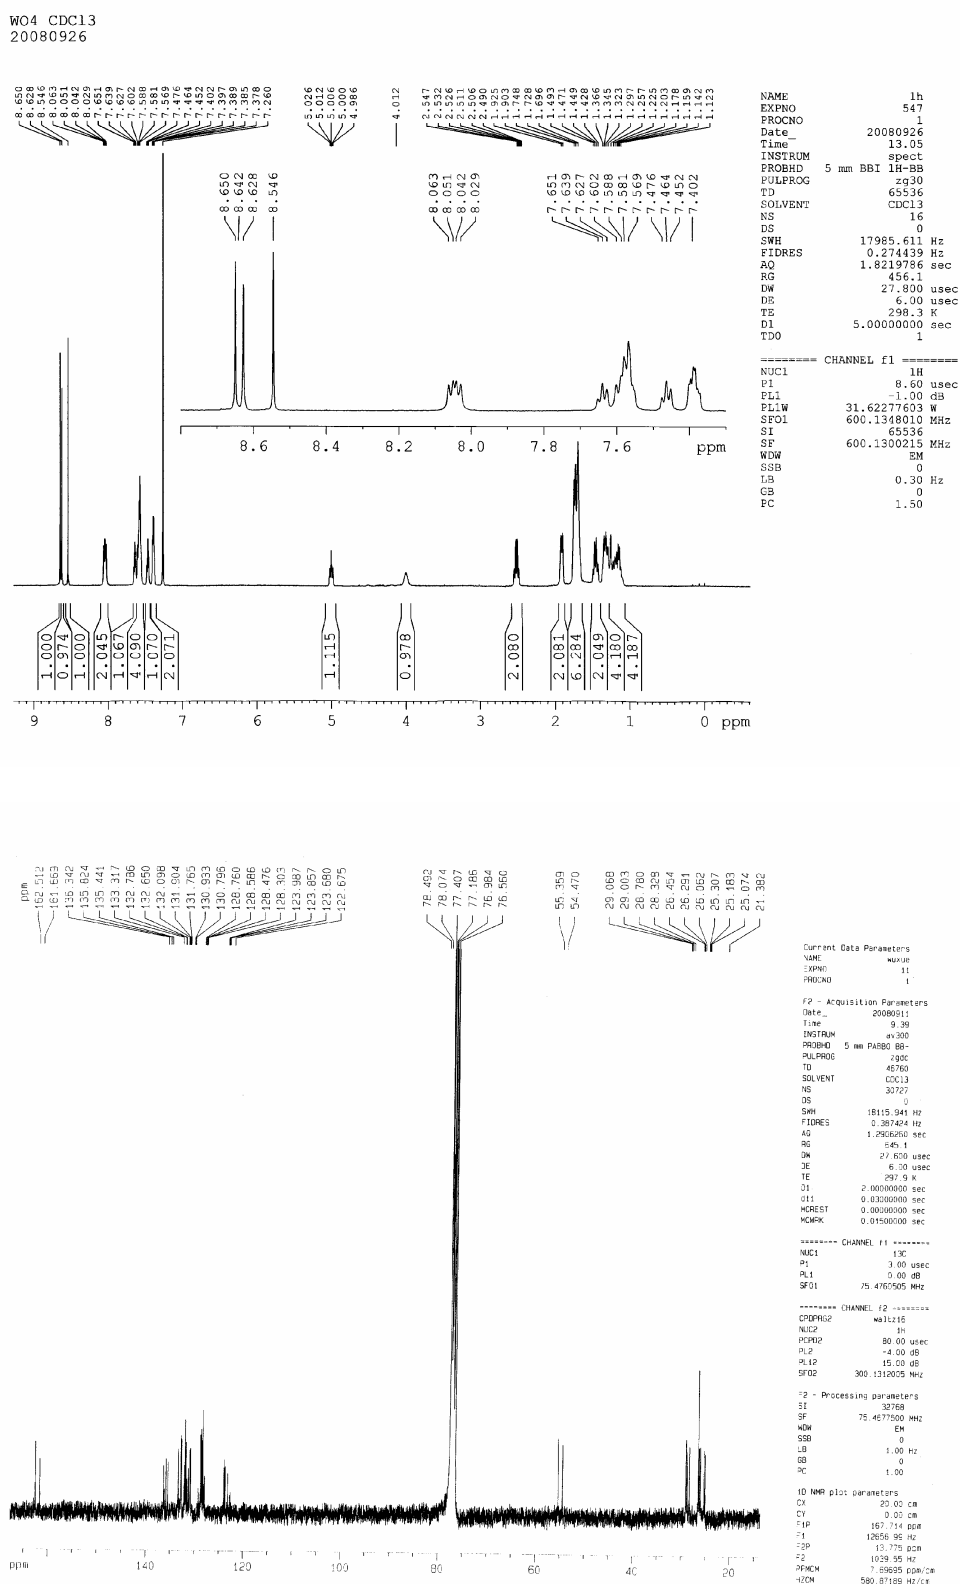

Figure S5 <sup>1</sup>H-NMR and <sup>13</sup>C-NMR spectra of **3**.

D:\Data\_ICI\2008\08-05\20080507\2008050712\0\_B311

printed: 5/7/2008 2:42:37 PM

### MALDI-TOF, CCA, W03, 2008, 05, 07

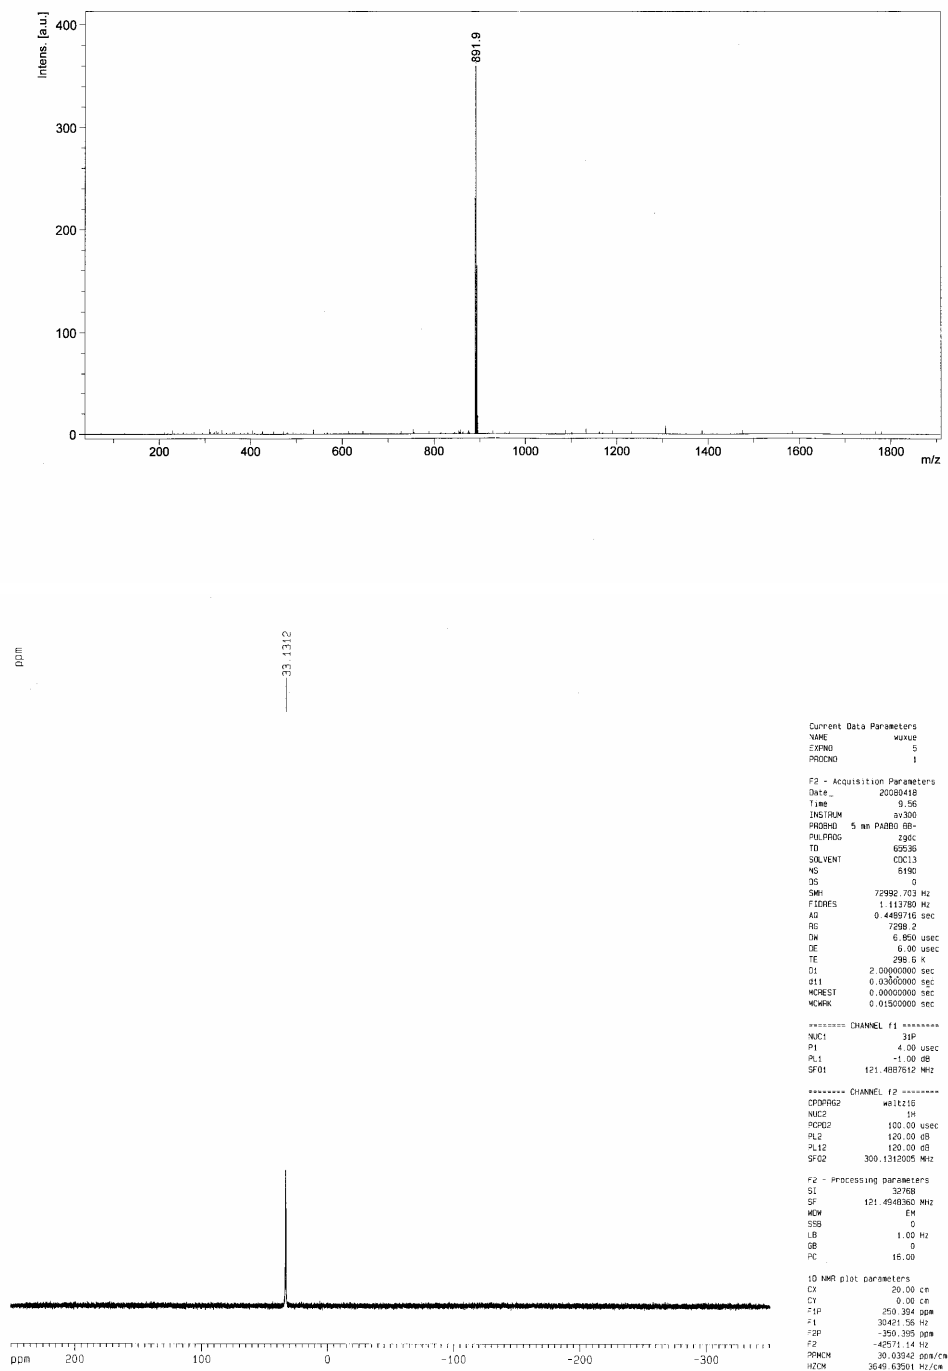

Figure S6 MS and <sup>31</sup>P-NMR spectra of **3**.
